# Supplementary material for: Periosteal skeletal stem cells can migrate into the bone marrow and support hematopoiesis after injury
Source: bioRxiv or medRxiv preprint supplement (doi:10.1101/2023.01.12.523842), 2025-01-14
Supplement: Supplementary file [file media-1.pdf]

# Supplemental Figure 1

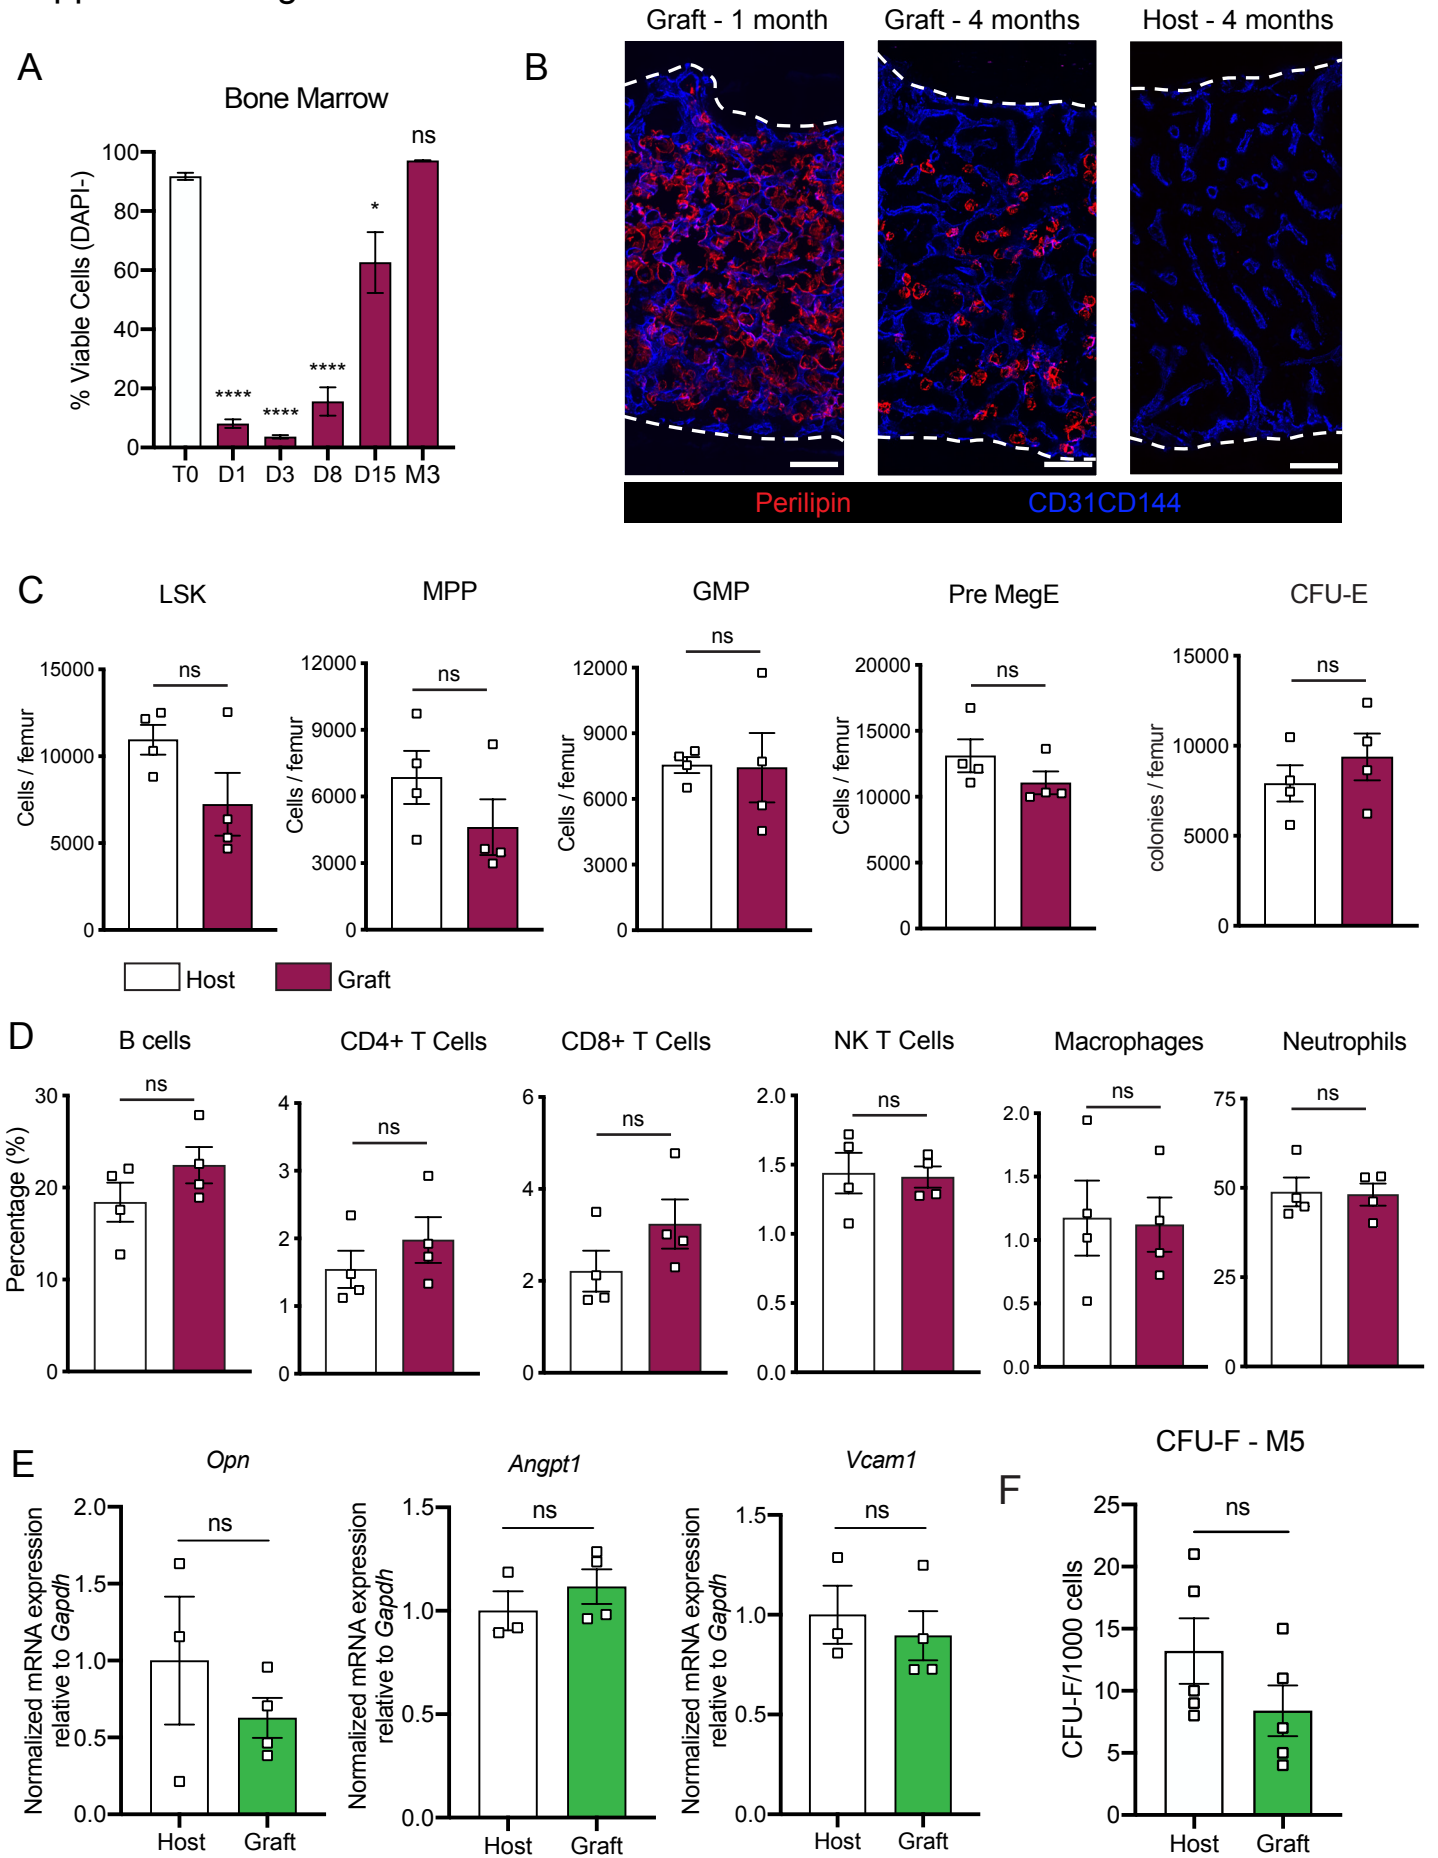

### Supplemental Figure 1. Bone marrow regeneration after transplantation.

- A. Cell viability determined by flow cytometry and expressed as percentage of total DAPI- alive cells in the BM graft at steady state, 1, 3, 8, 15 days and 3 months after bone transplantation (n=3-4). One-way ANOVA with Dunnett's multiple comparisons test used to determine statistical significance.
- B. Representative whole-mount confocal z-stack projections of host and graft femurs at 1 and 4 months after transplantation. Adipocytes are stained using an anti-perilipin antibody. Scale bar = 50µm. Three independent experiments yielded similar results.
- C. Comparison of different hematopoietic progenitors' populations between graft and host at 5 months after bone transplantation (n=4 per group).
- D. Comparison of different hematopoietic populations between graft and host at 5 months after bone transplantation (n=4 per group).
- E. Quantitative RT-PCR analysis of mRNA expression of *Opn*, *Angpt1*, and *Vcam1* relative to *Gapdh* in host and graft *Nes-GFP<sup>+</sup>* BM-MSCs at 5 months after transplantation (n=3-4 mice).
- F. Number of CFU-F colonies formed by flushed *CD45<sup>-</sup>Ter119<sup>-</sup>Nes-GFP<sup>+</sup>* BM-MSCs sorted from host and graft femurs 5 months after transplantation and plated at equal number and clonal densities under CFU-F culture conditions (n=5 mice per group). Data represented as mean ± SEM. Unless otherwise noted, statistical significance was determined using unpaired two-tailed Student's t test. \*p<0.05. \*\* p<0.01. \*\*\* p<0.001. \*\*\*\*p<0.0001.

# Supplemental Figure 2

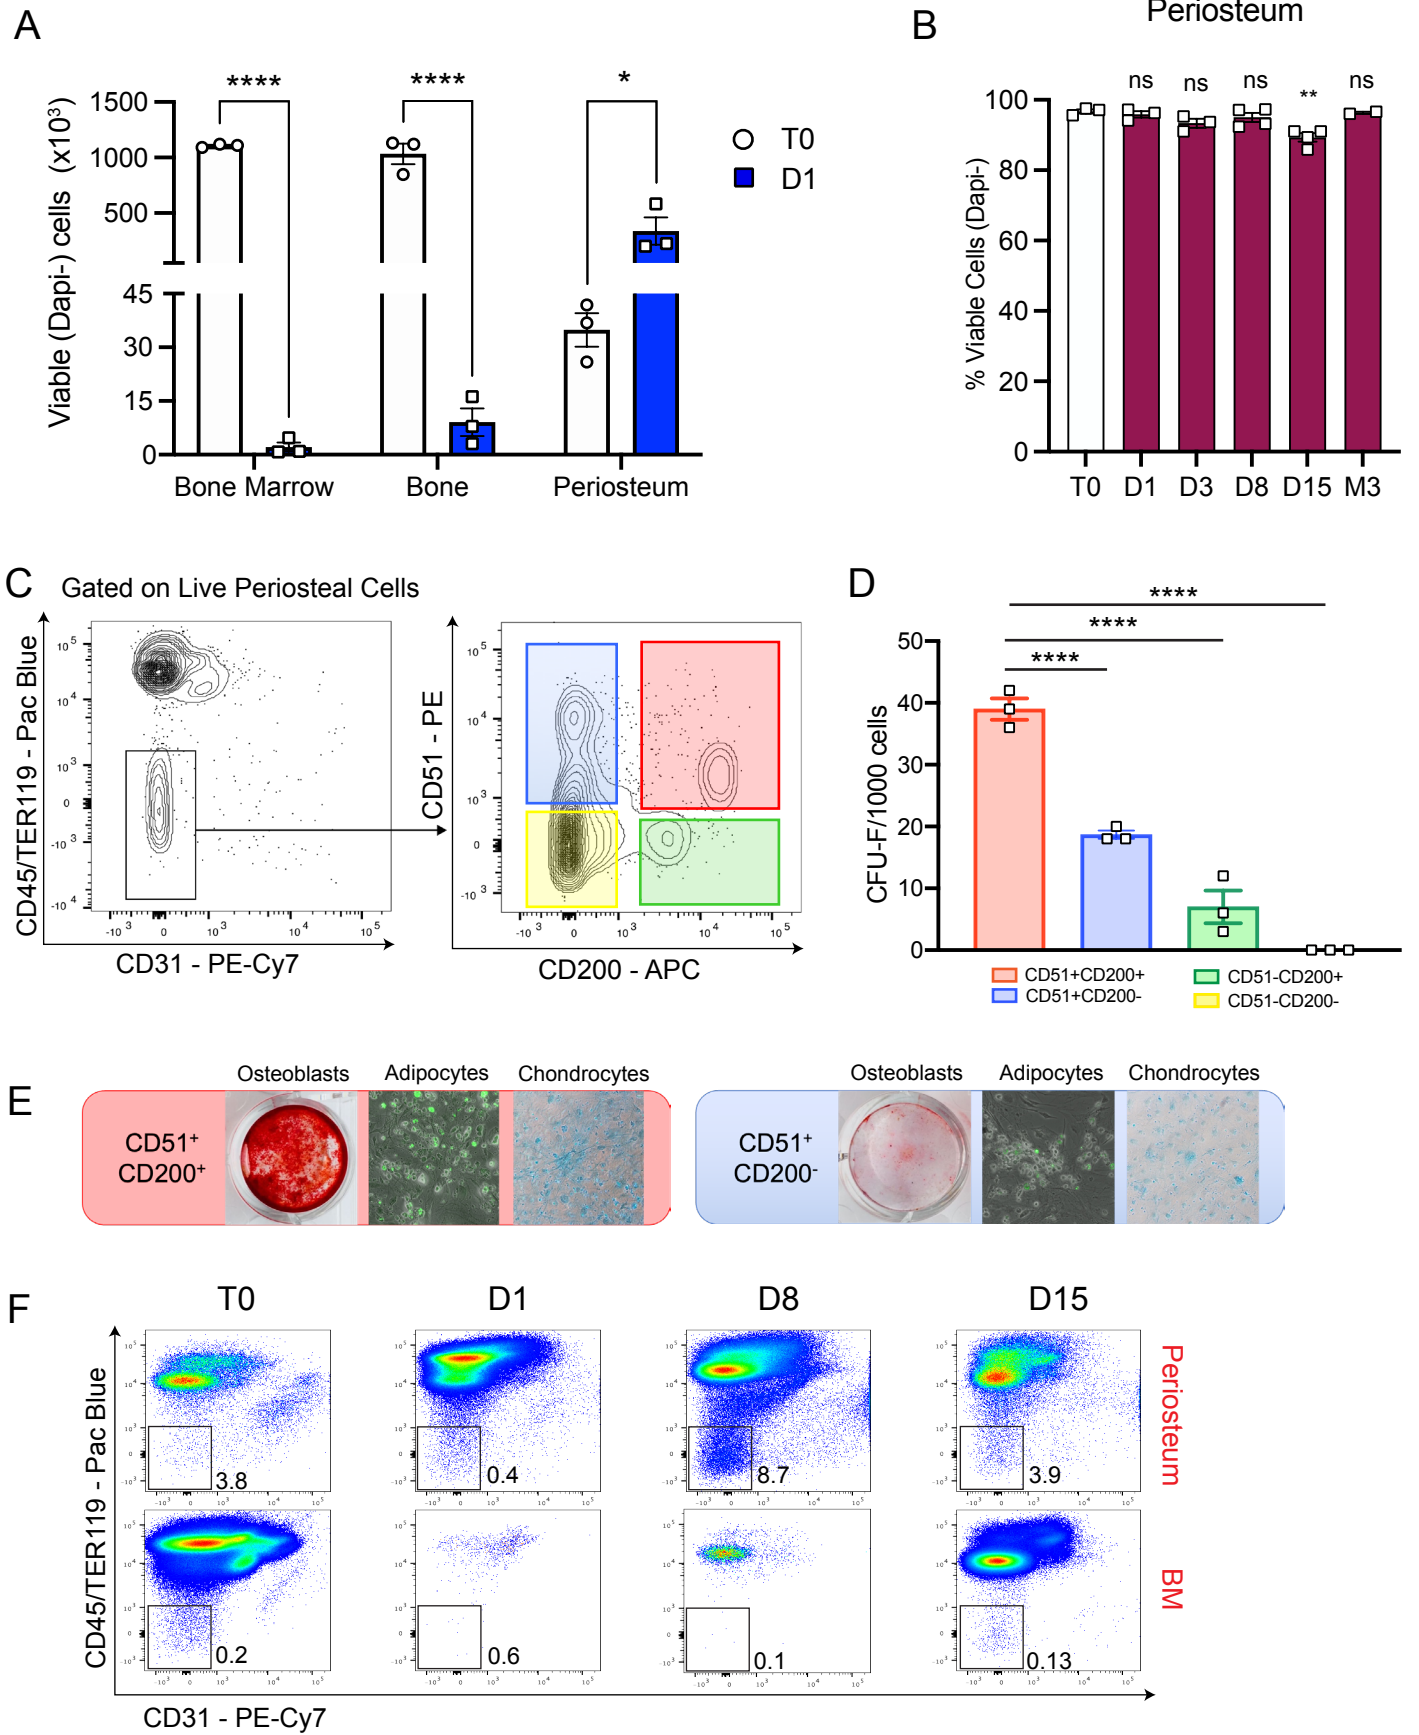

### **Supplemental Figure 2. Periosteal stem cells expansion after transplantation.**

- A. Number of viable cells within bone marrow, bone and periosteum at steady state and 24 hours post transplantation (n=3 per group).
- B. Cell viability determined by flow cytometry and expressed as percentage of total DAPI- alive cells in the periosteum graft at steady state and at 1, 3, 8, 15 days and at 3 months after bone transplantation (n=2-4 per group). One-way ANOVA with Dunnett's multiple comparisons test was used to determine statistical significance.
- C. Representative FACS plot showing gating of CD51<sup>+</sup>CD200<sup>+</sup> P-SSCs after gating on stromal (CD45<sup>-</sup>Ter119<sup>-</sup>CD31<sup>-</sup>) fraction.
- D. Absolute CFU-F number from 1000 sorted cells within various cell populations of the periosteum. One-way ANOVA with Dunnett's multiple comparisons test was used to determine statistical significance.
- E. Representative trilineage differentiation pictures of CD51<sup>+</sup>CD200<sup>+</sup> compared to the group with the next highest CFU-F activity (CD51<sup>+</sup>CD200<sup>-</sup> cells). Differentiation into osteoblasts, adipocytes and chondrocytes observed using Alizarin Red, Bodipy, and Alcan Blue staining, respectively.
- F. Representative FACS plots of graft periosteum and bone marrow analysis gated on CD45<sup>-</sup>Ter119<sup>-</sup>CD31<sup>-</sup> fraction at steady state and at one-, eight- and fifteen-days post transplantation. Data represented as mean  $\pm$  SEM. Unless otherwise noted, statistical significance was determined using unpaired two-tailed Student's t test.  
\*p<0.05. \*\* p<0.01. \*\*\* p<0.001. \*\*\*\*p<0.0001.

# Supplemental Figure 3

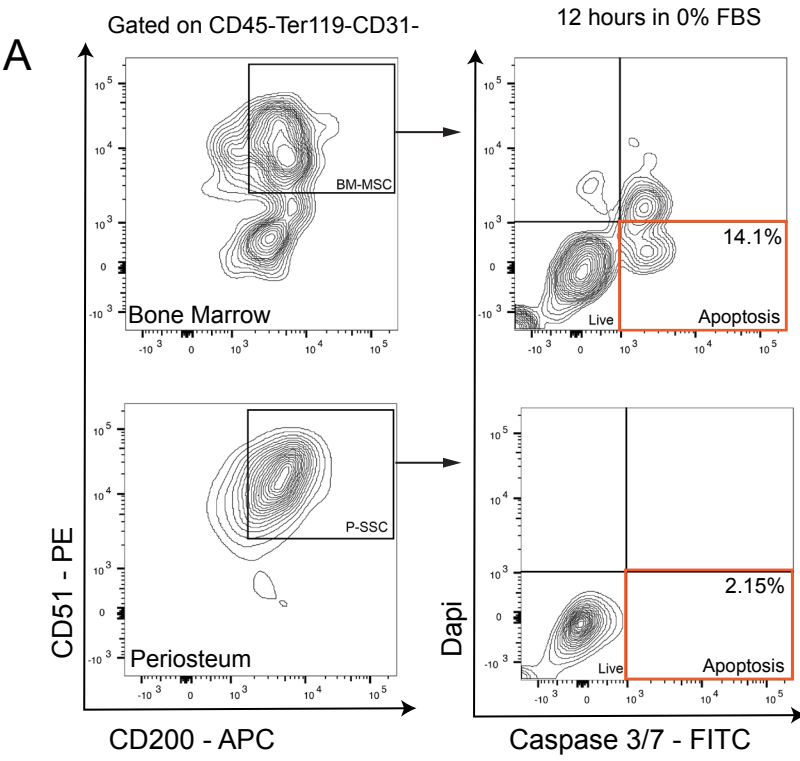

**Supplemental Figure 3. Comparison of periosteal SSCs and bone marrow MSCs.**

A. Representative FACS plots showing gating strategy for analyzing apoptosis at 12 hours after switching from 20% to 0% FBS media.

Data represented as mean  $\pm$  SEM. Unless otherwise noted, statistical significance was determined using unpaired two-tailed Student's t test. \* $p < 0.05$ . \*\*  $p < 0.01$ . \*\*\*  $p < 0.001$ . \*\*\*\* $p < 0.0001$ .

# Supplemental Figure 4

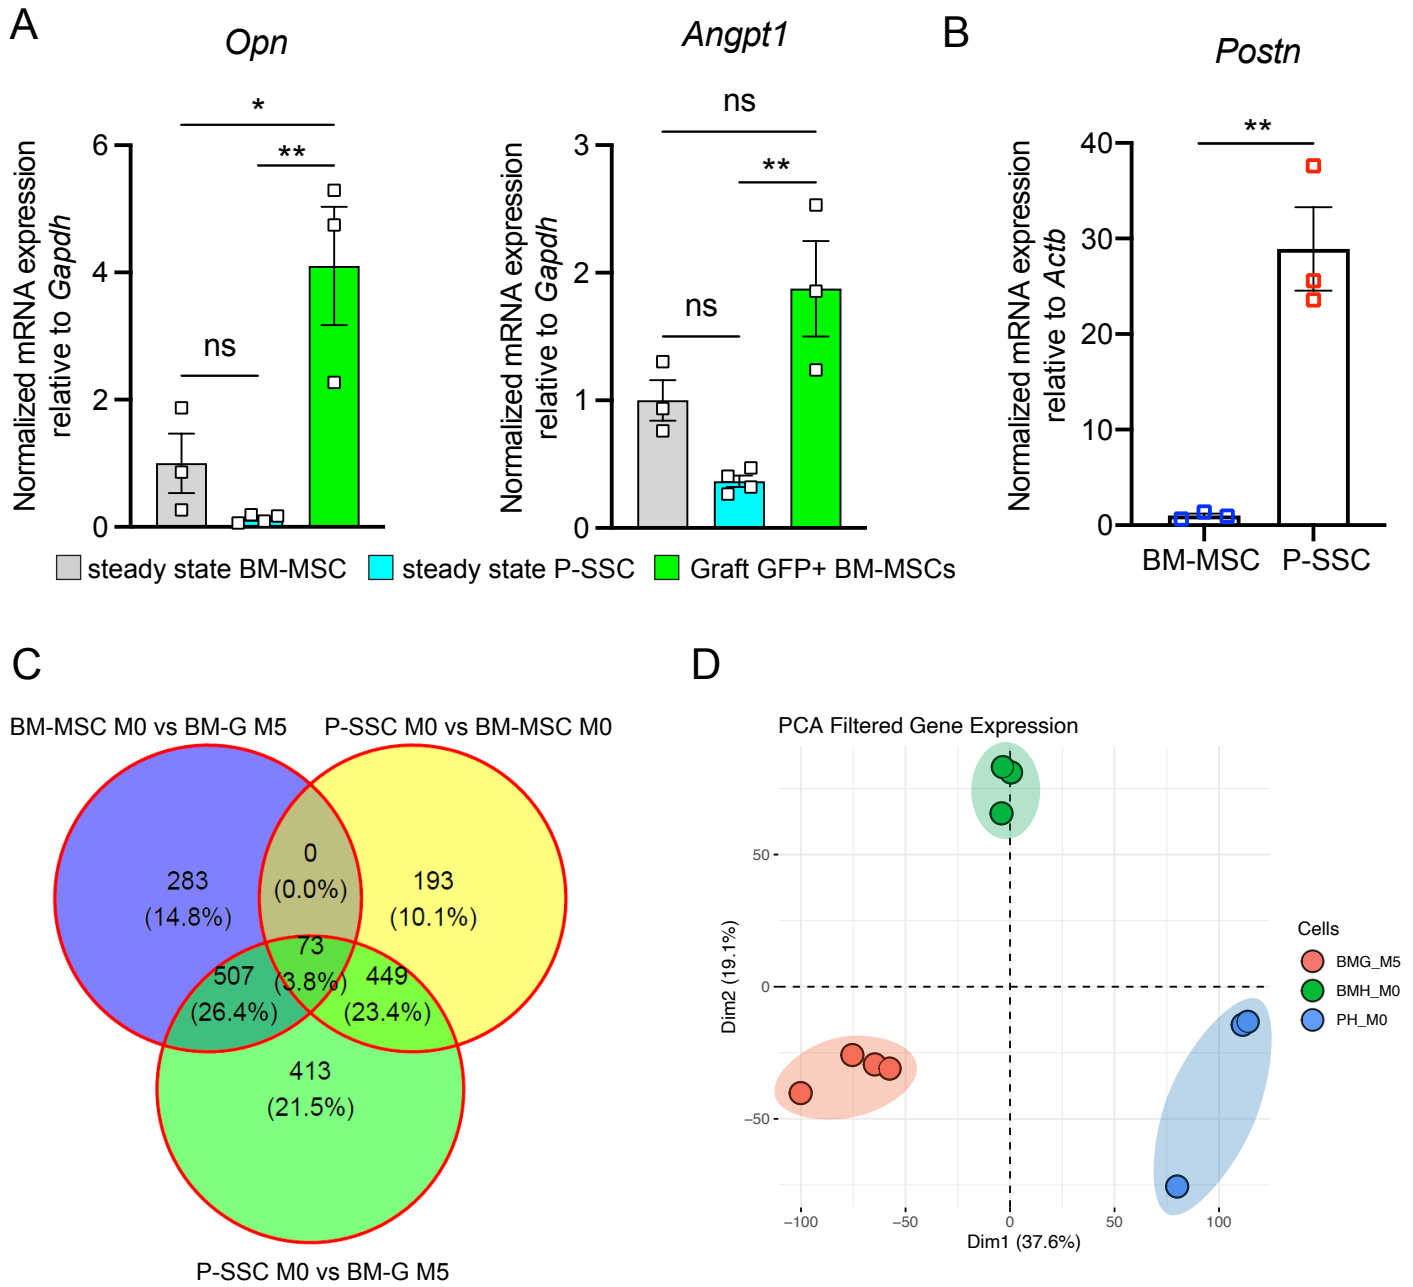

**Supplemental Figure 4. Periosteal SSCs migrate into the bone marrow and upregulate HSC-niche factors.**

- A. Quantification of *Opn* and *Angpt1* mRNA level relative to *Gapdh* in sorted control bone marrow CD45<sup>-</sup>Ter119<sup>-</sup>CD31<sup>-</sup>Nestin-GFP<sup>+</sup> BM-MSCs, CD45<sup>-</sup>Ter119<sup>-</sup>CD31<sup>-</sup>CD51<sup>+</sup>CD200<sup>+</sup> steady-state P-SSCs, and CD45<sup>-</sup>Ter119<sup>-</sup>CD31<sup>-</sup>CD51<sup>+</sup>CD200<sup>+</sup>GFP<sup>+</sup> graft BM-MSCs (n=3-4 per group). One-way ANOVA was used to determine statistical significance.
- B. *Postn* expression in sorted, steady-state CD51<sup>+</sup>CD200<sup>+</sup> BM-MSCs and P-SSCs from CD45.2 WT mice (n=3).
- C. Venn diagram of RNA sequencing analysis comparing the numbers of differentially expressed genes between the groups
- D. 2D principal component analysis (PCA) plot showing the variance between graft BM-MSCs at five months post transplantation, and BM-MSCs and P-SSCs at steady state (n=3-4).

Data represented as mean  $\pm$  SEM. Unless otherwise noted, statistical significance was determined using unpaired two-tailed Student's t test. \*p<0.05. \*\* p<0.01. \*\*\* p<0.001. \*\*\*\*p<0.0001.



Supplementary Table 1: Flow Cytometry Antibodies

| <b>Antibody</b>     | <b>Clone</b> | <b>Fluorochrome (Manufacturer)</b>                                                          |
|---------------------|--------------|---------------------------------------------------------------------------------------------|
| anti-CD45           | 30-F11       | APC-Cy7 (eBioscience), Pacific Blue (Biolegend)                                             |
| anti-Ter119         | Ter-119      | APC-Cy7 (eBioscience), Pacific Blue (Biolegend), AF700 (Biolegend), biotin (BD Biosciences) |
| anti-CD31           | 390          | PE-Cy7 (Biolegend; eBioscience), AF647 (Biolegend)                                          |
| anti-CD51           | RMV-7        | biotin (Biolegend), PE (eBioscience)                                                        |
| anti-CD200          | OX-90        | APC (Biolegend)                                                                             |
| anti-CD140 $\alpha$ | APA5         | PE-Cy7 (eBioscience), APC (Biolegend)                                                       |
| anti-streptavidin   | (n/a)        | FITC (eBioscience), APC-Cy7 (eBioscience), BV570 (Biolegend)                                |
| anti-CD11b          | M1/70        | AF647 (Biolegend), biotin (BD Biosciences)                                                  |
| anti-CD4            | GK1.5        | PE-Cy7 (eBioscience)                                                                        |
| anti-CD8a           | 53-6.7       | PE-Cy7 (eBioscience)                                                                        |
| anti-B220           | RA3-6B2      | PerCP-Cy5.5 (eBioscience), biotin (BD Biosciences)                                          |
| anti-CD45.1         | A20          | PE (Biolegend)                                                                              |
| anti-CD45.2         | 104          | FITC (Biolegend)                                                                            |
| anti-Ki67           | SolA15       | FITC (eBioscience)                                                                          |
| anti-CD144          | BV13         | AF647 (Biolegend)                                                                           |
| anti-Gr-1           | RB6-8C5      | APC-Cy7 (eBioscience), FITC, biotin (BD Biosciences)                                        |
| anti-CD150          | TC15-12F12.2 | PE (Biolegend)                                                                              |
| anti-CD117          | 2B8          | BV421 (Biolegend)                                                                           |
| anti-Sca-1          | D7           | FITC (eBioscience)                                                                          |
| anti-CD105          | MJ7/18       | PE-Cy7 (Biolegend)                                                                          |
| anti-CD41           | MWReg30      | PerCP-e710 (eBioscience)                                                                    |
| anti-CD16/32        | 93           | APC-Cy7(Biolegend)                                                                          |
| anti-CD48           | HM48-1       | AF647 (Biolegend)                                                                           |
| anti-CD3e           | 145-2C11     | biotin (BD Biosciences)                                                                     |
| anti-F4/80          | BM8          | AF647 (Biolegend)                                                                           |
| anti-NK1.1          | PK136        | BV421 (Biolegend)                                                                           |
| anti-CD115          | AFS98        | PE (eBioscience)                                                                            |

Supplementary Table 2: RT-PCR primer sequences

| <b>Primer</b> | <b>Forward Sequence (5' → 3')</b> | <b>Reverse Sequence (5' → 3')</b> |
|---------------|-----------------------------------|-----------------------------------|
| <i>Cxcl12</i> | 5'-CGCCAAGGTCGTCGCCG-3'           | 5'-TTGGCTCTGGCGATGTGGC-3'         |
| <i>Kitl</i>   | 5'-CCCTGAAGACTCGGGCCTA-3'         | 5'-CAATTACAAGCGAAATGAGAGCC-3'     |
| <i>Opn</i>    | 5'-AGCAAGAAACTCTTCCAAGCAA-3'      | 5'-GTGAGATTCGTCAGATTCATCCG-3'     |
| <i>Angpt1</i> | 5'-CTCGTCAGACATTCATCATCCAG-3'     | 5'-CACCTTCTTTAGTGCAAAGGCT-3'      |
| <i>Vcam1</i>  | 5'-GACCTGTTCCAGCGAGGGTCTA-3'      | 5'-CTTCCATCCTCATAGCAATTAAGGTG-3'  |
| <i>Cdkn1a</i> | 5' CCTGGTGATGTCCGACCTG-3'         | 5' CCATGAGCGCATCGCAATC-3'         |
| <i>Cdkn1c</i> | 5-CGAGGAGCAGGACGAGAATC-3'         | 5' GAAGAAGTCGTTTCGCATTGGC-3'      |
| <i>Cdk4</i>   | 5'-ATGGCTGCCACTCGATATGAA 3'       | 5' TCCTCCATTAGGAACTCTCACAC-3'     |
| <i>Sod1</i>   | 5'-TGGTGGTCCATGAGAAACAA-3'        | 5'-GTTTACTGCGCAATCCCAAT-3'        |
| <i>Gls</i>    | 5' TTCGCCCTCGGAGATCCTAC-3'        | 5' CCAAGCTAGGTAACAGACCCT-3'       |
| <i>Gpx1</i>   | 5'-AGTCCACCGTGTATGCCTTCT-3'       | 5'- GAGACGCGACATTCTCAATGA-3'-3'   |
| <i>Postn</i>  | 5'-CCTGCCCTTATATGCTCTGCT-3'       | 5'-AAACATGGTCAATAGGCATCACT-3'     |
| <i>Gapdh</i>  | 5'-TGTGTCCGTCGTGGATCTGA-3'        | 5'-CCTGCTTCACCACCTTCTTGA-3'       |
| <i>Actb</i>   | 5' GCTTCTTTGCAGCTCCTTCGT-3'       | 5' ATCGTCATCCATGCCGAACT-3'        |
